# Supplementary material for: Factorized vs. Normalized Spectra: Comparative Spectrophotometric Approaches for Enhancing the Resolution of Zero-Order Absorption Spectra of Olanzapine and Fluoxetine in Mixtures
Source: Research Square preprint supplement (doi:10.21203/rs.3.rs-7659193/v1), 2025-10-10
Supplement: Supplementary file 1 [file 07e9d5a1f78ada20973d3e19.docx]

**Table 1:** Assay parameters and method validation obtained by applying the proposed spectrophotometric methods

| **Parameter** | **OLA** | **FLU** |
| --- | --- | --- |
| **D0 (nm)** | 226 | 226 |
| **Range (µg/mL)** | 1.5-14 | 3.5-35 |
| **Slope** | 0.0766 | 0.0378 |
| **Intercept** | 0.019 | 0.0316 |
| **Correlation coefficient (*r*)** | 0.9999 | 0.9999 |
| **Accuracy (Mean ±SD)** | 99.65 ± 0.48 | 100.27 ± 0.70 |
| **Intraday Precision (%RSDa)** | 0.090 | 0.249 |
| **Interday Precision (%RSDb)** | 0.639 | 0.756 |
| **LOD (µg/mL)** | 0.15 | 0.38 |
| **LOQ (µg/mL)** | 0.47 | 1.15 |

%RSDa & %RSDb: Intraday and interday precision were evaluated at three concentration levels for each drug (OLA: 4, 6, 12 µg/mL; FLU: 4, 14, 30 µg/mL), with each measured in triplicate (n = 3).

**Table 2.** Determination of OLA and FLU in laboratory prepared mixtures using the proposed spectrophotometric methods

| **Concentration**  **(µg/mL)** | **OLA** | | **FLU** | |
| --- | --- | --- | --- | --- |
| **CM**  **D0**  **226 nm** | **FZM**  **D0**  **226 nm** | **CM**  **D0**  **226 nm** | **FZM**  **D0**  **226 nm** |
| **Lab mixture**  **concentration**  **(FLU:OLA)** | **Recovery % ± SD** | | | |
| **20:7** | 100.33  ±0.22 | 100.96  ±0.22 | 99.24  ±0.20 | 98.80  ±0.20 |
| **25:6*** | 99.85  ±0.34 | 100.31  ±0.35 | 100.49  ±0.32 | 100.27  ±0.32 |
| **35:3** | 99.86  ±0.34 | 100.75  ±0.98 | 99.99  ±0.31 | 99.59  ±0.31 |
| **10:10** | 99.87  ±0.66 | 100.24  ±0.67 | 99.86  ±0.59 | 99.10  ±0.59 |
| **15:5** | 99.46  ±0.36 | 100.30  ±0.37 | 99.69  ±0.33 | 99.13  ±0.33 |
| **Dosage form**  **(Psycholanz®)**  **25:6** | **Recovery % ± SD** | | | |
| 99.80  ±0.33 | 100.26  ±0.33 | 100.44  ±0.31 | 100.22  ±0.31 |

*****Dosage form ratio

**Table 3.** Statistical comparison between results obtained by the proposed methods and the USP official methods for the determination of OLA and FLU in pure form

|  | **OLA** | | **FLU** | |
| --- | --- | --- | --- | --- |
| **Parameters** | **D0**  **226 nm** | **USP Official**  **Methoda** | **D0**  **226 nm** | **USP Official**  **Methodb** |
| **Mean** | 100.35 | 100.19 | 99.98 | 100.01 |
| **S.D.** | 1.45 | 0.76 | 0.61 | 0.55 |
| **N** | 6 | 6 | 6 | 6 |
| **Variance** | 2.1025 | 0.5776 | 0.3721 | 0.3025 |
| ***F* test**  **(5.05)** | 3.64 | -------- | 1.23 | -------- |
| **Student's**  ***t*-test**  **(2.23)** | 0.24 | -------- | 0.10 | -------- |

a **HPLC conditions:** Mobile phase: acetonitrile : buffer [prepared by dissolving 6.9 g of monobasic sodium phosphate in 1 L of water, adjusting the pH to 2.5 with phosphoric acid, and dissolving 12 g of sodium dodecyl sulfate in the resulting solution] (47:53, v/v); column: C18, 4.6 mm × 150 mm, 5 µm particle size; detection: UV at 260 nm.

b **HPLC conditions:** Mobile phase: tetrahydrofuran : methanol : buffer [triethylamine : water (1:98), adjusted to pH 6.0 with phosphoric acid] (30:10:60, v/v/v); column: C18, 4.6 mm × 250 mm, 5 µm particle size; detection: UV at 227 nm.

*The figures in parenthesis are the corresponding theoretical values at P = 0.05.*

**Table 4: One way ANOVA testing of the proposed methods and the USP official methods [4] for the determination of OLA and FLU in pure form:**

|  | **Source of Variation** | **Sum of squares** | **Degree of freedom** | **Mean square** | ***F*** | ***F* critical** |
| --- | --- | --- | --- | --- | --- | --- |
| **OLA** | Between Groups | 0.07 | 1.00 | 0.07 | 0.06 | 4.96 |
| Within Groups | 13.37 | 10.00 | 1.34 |
| Total | 13.45 | 11.00 |  |
| **FLU** | Between Groups | 0.003 | 1.00 | 0.003 | 0.01 | 4.96 |
| Within Groups | 3.42 | 10.00 | 0.34 |
| Total | 3.42 | 11.00 |  |
